# Supplementary material for: PBDTTPD for plastic solar cells via Pd(PPh3)4-catalyzed direct (hetero)arylation polymerization
Source: Royal Society of Chemistry journal article supplement (doi:10.1039/c6ta06679h), 2016-01-01
Supplement: c6ta06679h1.pdf [file c6ta06679h1.pdf]

## Electronic Supplementary Information

### **PBDTTPD for plastic solar cells via Pd(PPh<sub>3</sub>)<sub>4</sub>-catalyzed Direct (Hetero)Arylation Polymerization**

G. Marzano,<sup>a</sup> F. Carulli,<sup>b</sup> F. Babudri,<sup>a</sup> A. Pellegrino,<sup>c</sup> R. Po,<sup>c</sup> S. Luzzati,<sup>b</sup> G.M. Farinola<sup>a\*</sup>

<sup>a</sup>*Dipartimento di Chimica, Università degli Studi di Bari Aldo Moro, Via Orabona 4, 70125 Bari, Italy*

<sup>b</sup>*Consiglio Nazionale delle Ricerche, CNR, Istituto per lo Studio delle Macromolecole, ISMAC, via Bassini 15, 20133 Milan, Italy*

<sup>c</sup>*Centro Ricerche per le Energie Rinnovabili e l'Ambiente, Istituto Eni Donegani, Eni S.p.A, Via Fauser 4, 28100 Novara, Italy*

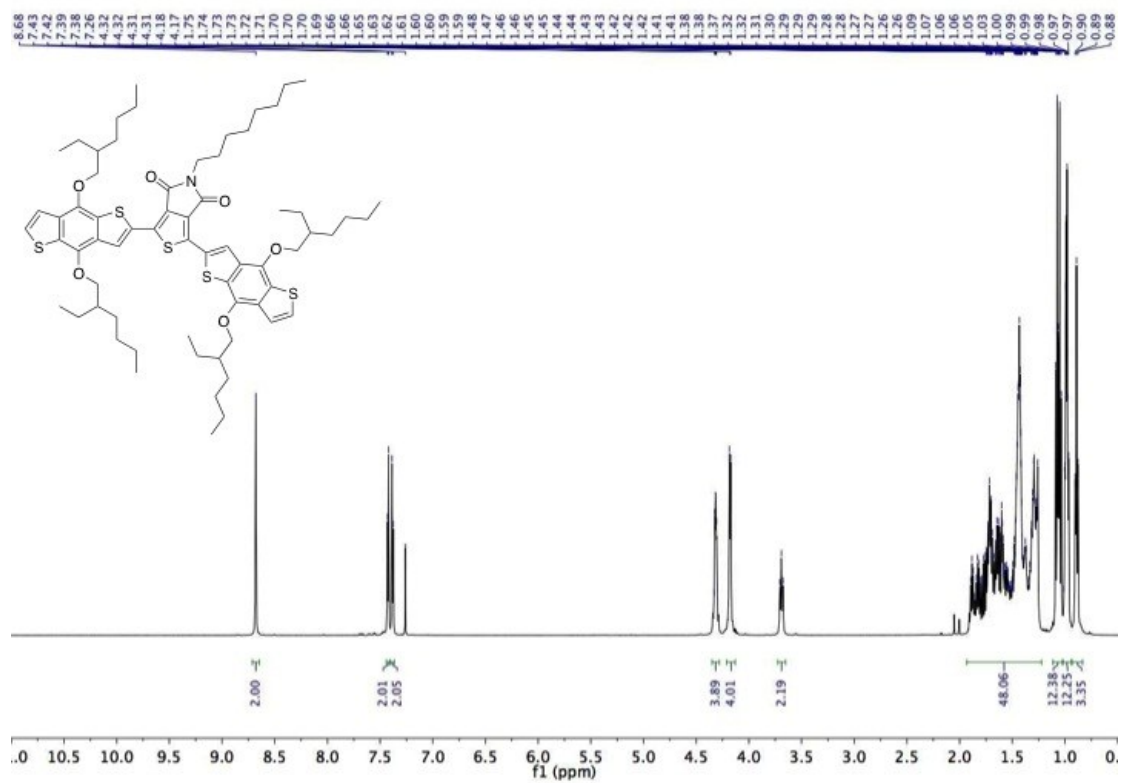

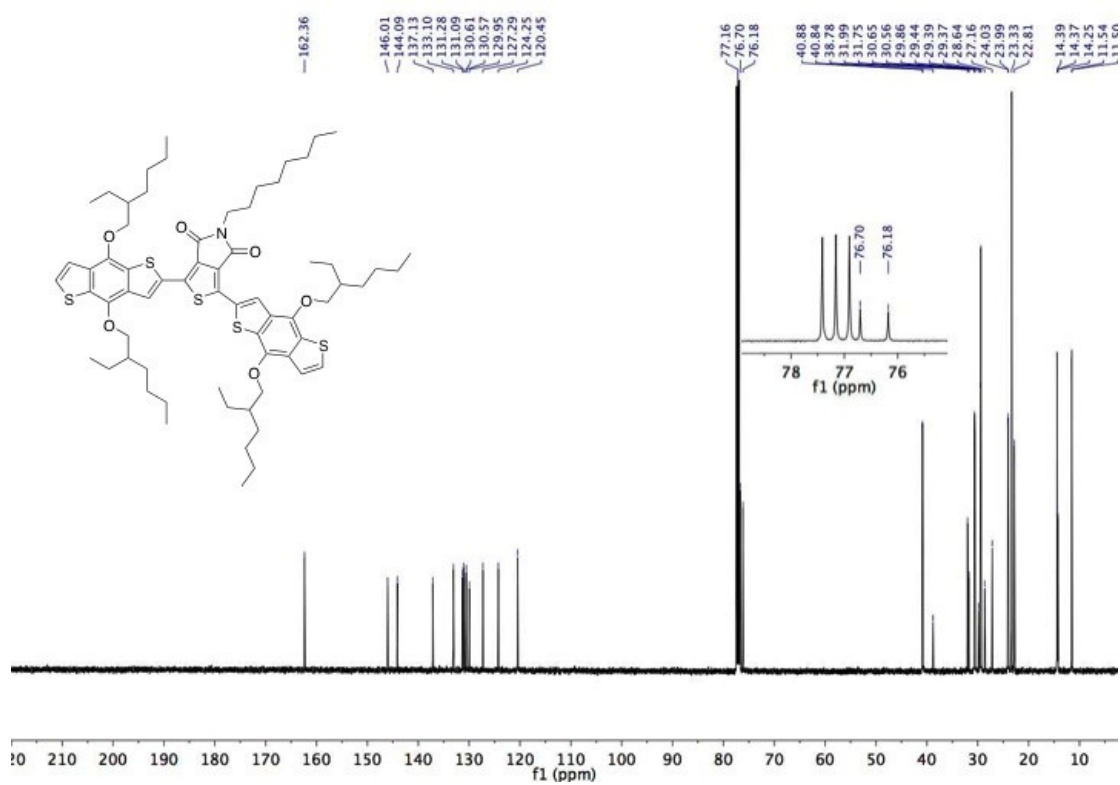

Figure S2. <sup>13</sup>C NMR spectrum (CDCl<sub>3</sub>, 100 MHz) of 1,3-bis(4,8-bis((2-ethylhexyl)oxy)benzo[1,2-*b*:4,5-*b'*]dithiophen-2-yl)-5-octyl-4*H*-thieno[3,4-*c*]pyrrole-4,6(5*H*)-dione

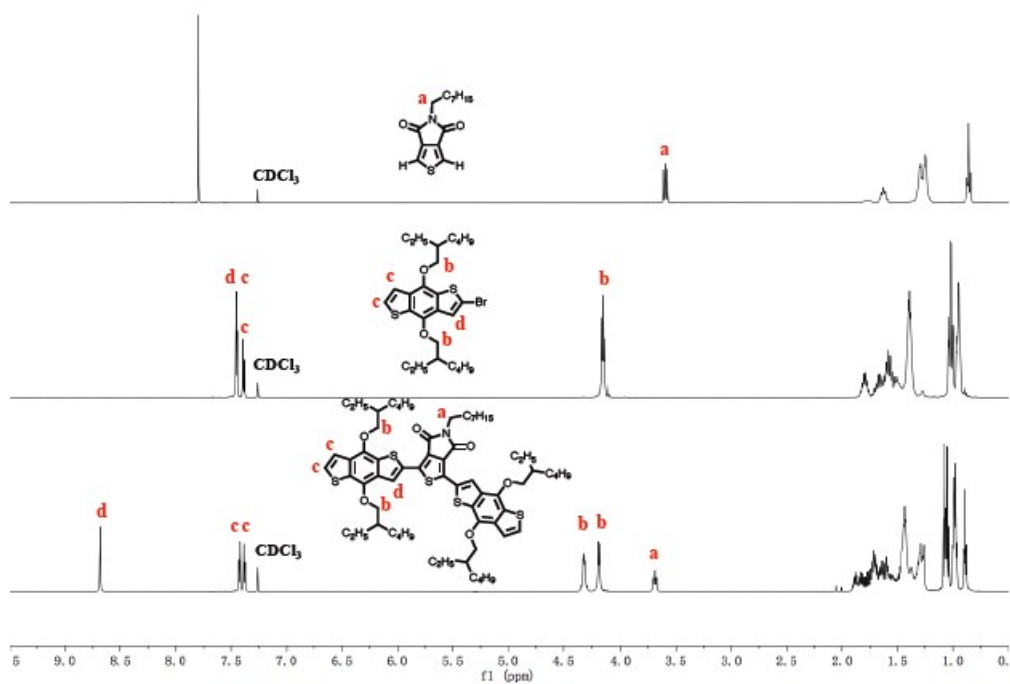

Figure S3. <sup>1</sup>H-NMR spectra (500 MHz, CDCl<sub>3</sub>) of 1, 2 and 3 involved in the model direct arylation reaction

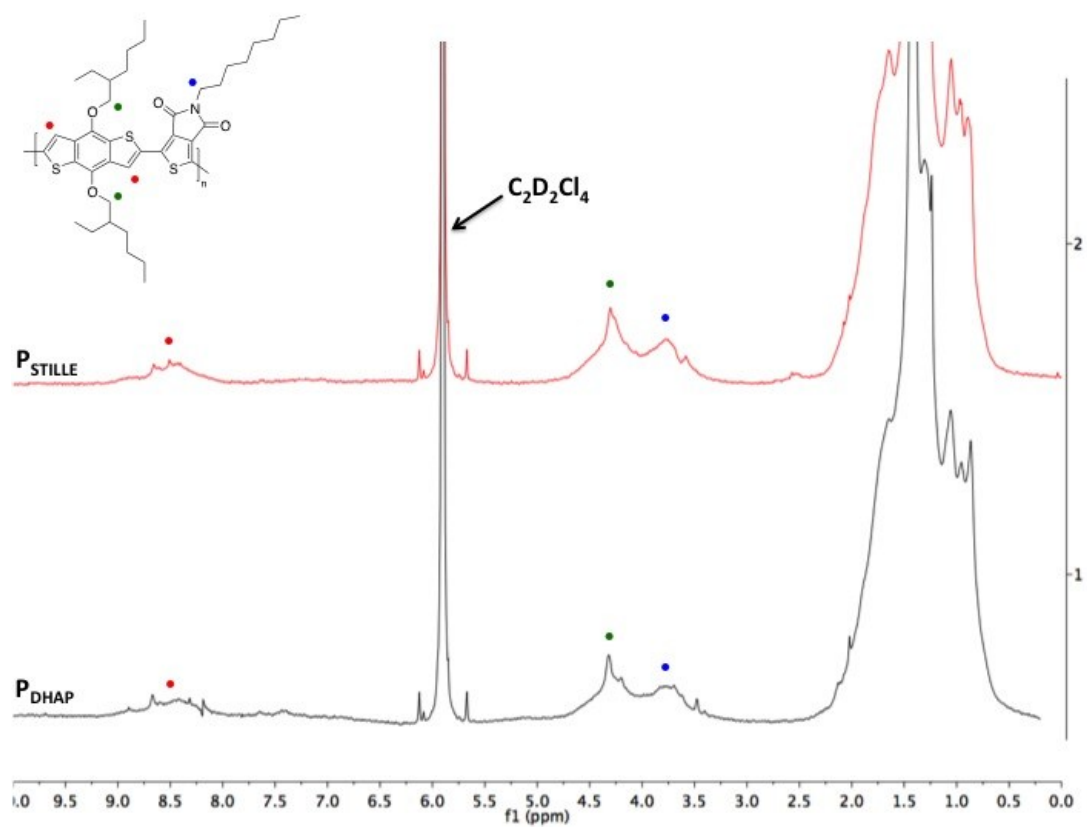

Figure S4. High temperature <sup>1</sup>H NMR spectra (C<sub>2</sub>D<sub>2</sub>Cl<sub>4</sub>, 500 MHz, 90°C) of P<sub>DHAP</sub> and P<sub>STILLE</sub> polymers

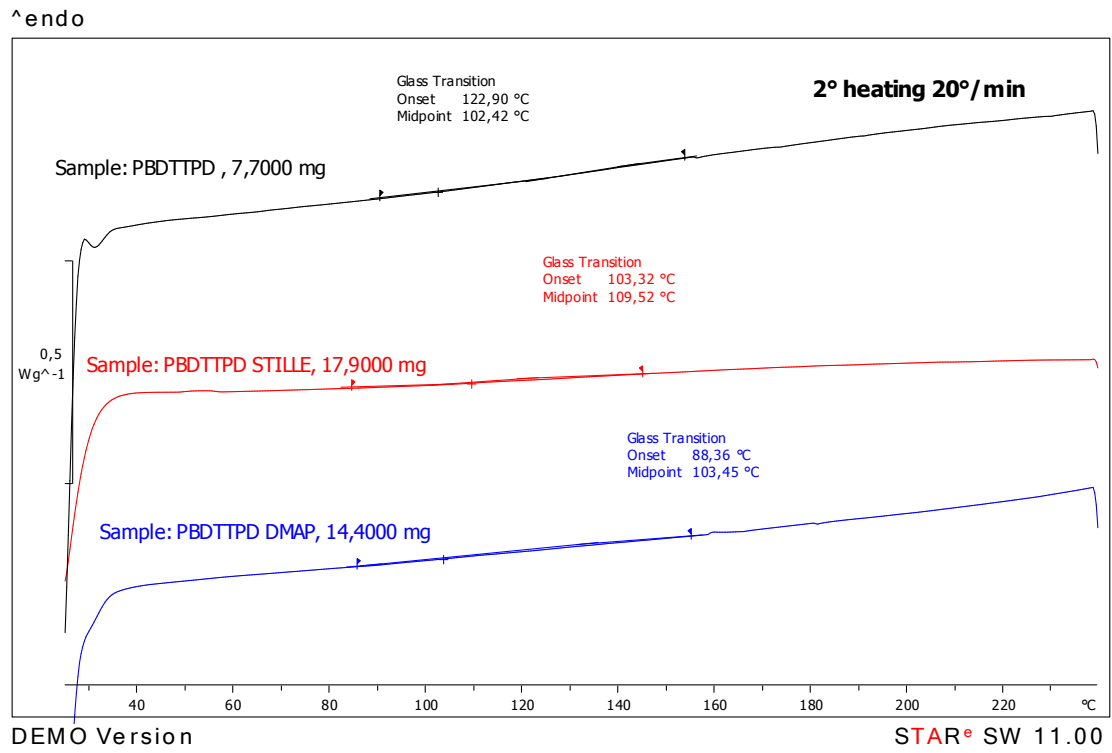

Figure S5. DSC thermograms of  $P_{COMM}$  (blackcurve),  $P_{STILLE}$  (red curve) and  $P_{DHAP}$  (blue profile)

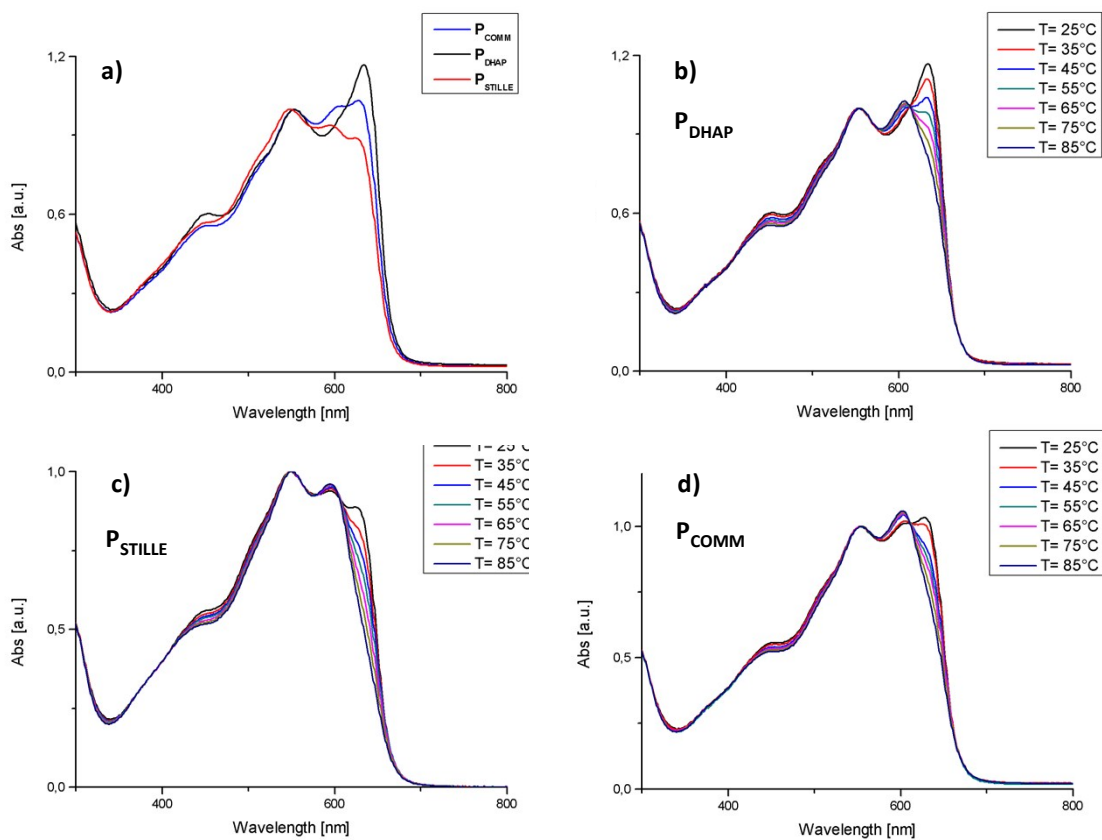

Figure S6. Normalized UV-Vis absorption spectra of  $P_{DHAP}$ ,  $P_{STILLE}$  and  $P_{COMM}$  in chlorobenzene solution (0.2 mg/mL) a) Comparison of the absorption spectra at 25°C b) c) d) Temperature-dependent UV-Vis spectra of  $P_{DHAP}$ ,  $P_{STILLE}$  and  $P_{COMM}$ , respectively, in the range 25°C–85°C.

Table S1. ICP-MS analyses of P<sub>COMM</sub>, P<sub>DHAP</sub> and P<sub>STILLE</sub>. All samples were completely digested under microwave conditions prior to analysis.

|    | P <sub>COMM</sub> (mg/Kg) | P <sub>DHAP</sub> (mg/Kg) | P <sub>STILLE</sub> (mg/Kg) |
|----|---------------------------|---------------------------|-----------------------------|
| Na | <100                      | <100                      | <100                        |
| K  | <100                      | <100                      | <100                        |
| Pd | 7060±40                   | 870±10                    | 420±10                      |
| Sn | 6100±100                  | /                         | 1410±10                     |



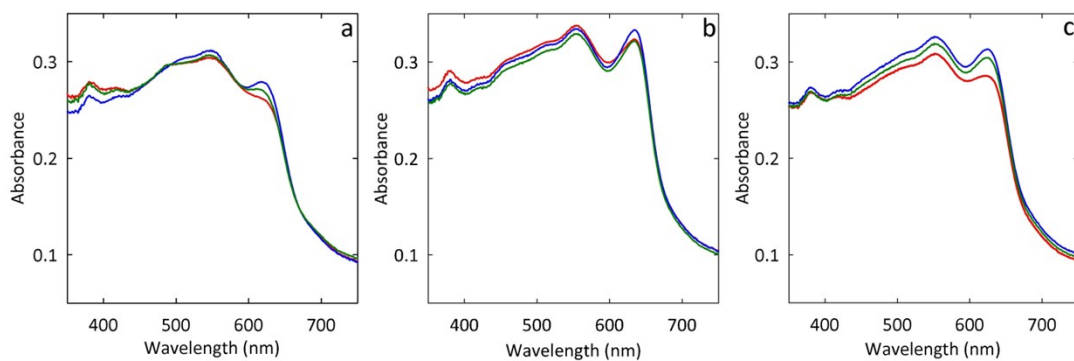

Figure S7. Absorbance spectra of the active layers based on PC<sub>71</sub>BM blended with P<sub>STILLE</sub> (a), P<sub>DHAP</sub> (b), P<sub>COMM</sub> (c). Red curves are related to different deposition conditions: from pure Chlorobenzene (red), from Chlorobenzene with 4% w/w of 1-chloronaphthalene (blue) and Chlorobenzene with 4% w/w of 1-chloronaphthalene treated with ethanol after deposition (green).
